# Supplementary material for: Combined transcriptome and metabolome analyses to understand the dynamic responses of rice plants to attack by the rice stem borer Chilo suppressalis (Lepidoptera: Crambidae)
Source: BMC Plant Biol. 2016 Dec 7;16:259. doi: 10.1186/s12870-016-0946-6 (PMC5142284; doi:10.1186/s12870-016-0946-6)
Supplement: Additional file 8: Table S7. — Significant (FDR < 0.01) GO terms (biological processes) associated with the grouped DEGs. (XLS 54 kb) [file 12870_2016_946_MOESM8_ESM.xls]

## Sheet: Table S7
Table S7. Significant (FDR < 0.01) GO terms (biological processes) associated with the grouped DEGs.
Class	GOID	GOTerm	DifGene	P-Value	FDR
I	GO:0010200	response to chitin	123	2.99584e-22	3.43623e-19
	GO:0009611	response to wounding	116	6.20675e-19	3.55957e-16
	GO:0009723	response to ethylene	77	6.51714e-16	2.49172e-13
	GO:0035556	intracellular signal transduction	66	1.18738e-15	3.40482e-13
	GO:0006612	protein targeting to membrane	104	2.59759e-15	5.95887e-13
	GO:0010363	regulation of plant-type hypersensitive response	104	3.7317e-15	7.13377e-13
	GO:0043069	negative regulation of programmed cell death	72	1.11815e-14	1.83216e-12
	GO:0009738	abscisic acid-activated signaling pathway	75	6.23084e-14	8.35194e-12
	GO:0008152	metabolic process	803	7.729e-14	8.35194e-12
	GO:0009867	jasmonic acid mediated signaling pathway	81	8.40906e-14	8.35194e-12
	GO:0009414	response to water deprivation	82	8.54507e-14	8.35194e-12
	GO:0019748	secondary metabolic process	88	8.73786e-14	8.35194e-12
	GO:0000165	MAPK cascade	74	1.28941e-13	1.13766e-11
	GO:0009607	response to biotic stimulus	137	1.63587e-12	1.34025e-10
	GO:0009862	systemic acquired resistance, salicylic acid mediated signaling pathway	73	1.75787e-12	1.34418e-10
	GO:0006950	response to stress	346	2.73464e-12	1.96039e-10
	GO:0009753	response to jasmonic acid	69	1.14844e-11	7.74857e-10
	GO:0002679	respiratory burst involved in defense response	48	1.57708e-11	1.00495e-09
	GO:0009695	jasmonic acid biosynthetic process	48	2.0779e-11	1.2544e-09
	GO:0009863	salicylic acid mediated signaling pathway	52	2.29405e-11	1.31564e-09
	GO:0009620	response to fungus	44	3.8141e-11	2.08323e-09
	GO:0031348	negative regulation of defense response	73	4.95608e-11	2.58392e-09
	GO:0042538	hyperosmotic salinity response	49	5.24895e-11	2.61763e-09
	GO:0050832	defense response to fungus	88	5.65587e-11	2.70304e-09
	GO:0055114	oxidation-reduction process	230	1.82695e-10	8.38206e-09
	GO:0042742	defense response to bacterium	82	9.69835e-10	4.27847e-08
	GO:0009719	response to endogenous stimulus	161	1.22221e-09	5.19213e-08
	GO:0043900	regulation of multi-organism process	36	5.98726e-09	2.45264e-07
	GO:0009628	response to abiotic stimulus	211	6.63429e-09	2.62398e-07
	GO:0009595	detection of biotic stimulus	37	1.01389e-08	3.87646e-07
	GO:0010310	regulation of hydrogen peroxide metabolic process	52	2.19305e-08	8.11428e-07
	GO:0006468	protein phosphorylation	197	2.86584e-08	1.02722e-06
	GO:0009813	flavonoid biosynthetic process	55	3.03709e-08	1.05562e-06
	GO:0009751	response to salicylic acid	50	3.66543e-08	1.23654e-06
	GO:0009805	coumarin biosynthetic process	30	3.86917e-08	1.26798e-06
	GO:0009409	response to cold	81	4.90685e-08	1.56338e-06
	GO:0016310	phosphorylation	217	5.27562e-08	1.63544e-06
	GO:0009697	salicylic acid biosynthetic process	67	7.31277e-08	2.18955e-06
	GO:0009698	phenylpropanoid metabolic process	26	7.54906e-08	2.18955e-06
	GO:0009963	positive regulation of flavonoid biosynthetic process	36	7.63575e-08	2.18955e-06
	GO:0031347	regulation of defense response	39	1.32481e-07	3.618e-06
	GO:0052696	flavonoid glucuronidation	39	1.32481e-07	3.618e-06
	GO:0030968	endoplasmic reticulum unfolded protein response	43	1.45309e-07	3.87605e-06
	GO:0009737	response to abscisic acid	82	1.71141e-07	4.46134e-06
	GO:0051707	response to other organism	32	2.18496e-07	5.56923e-06
	GO:0080167	response to karrikin	36	2.95155e-07	7.35963e-06
	GO:0006952	defense response	138	5.85851e-07	1.42973e-05
	GO:0009987	cellular process	578	6.7783e-07	1.61973e-05
	GO:0009407	toxin catabolic process	44	1.28279e-06	3.00277e-05
	GO:0009699	phenylpropanoid biosynthetic process	17	2.33434e-06	5.35497e-05
	GO:0009058	biosynthetic process	384	2.39522e-06	5.3869e-05
	GO:0006629	lipid metabolic process	120	3.09849e-06	6.83456e-05
	GO:0006865	amino acid transport	40	5.52124e-06	0.000119488
	GO:0055085	transmembrane transport	92	8.77334e-06	0.000186352
	GO:0009636	response to toxic substance	26	1.07624e-05	0.000224445
	GO:0009651	response to salt stress	104	1.36595e-05	0.000279775
	GO:0010583	response to cyclopentenone	32	1.57004e-05	0.000315937
	GO:0042398	cellular modified amino acid biosynthetic process	19	1.75535e-05	0.000347135
	GO:0006855	drug transmembrane transport	22	2.94394e-05	0.000572321
	GO:0010224	response to UV-B	29	3.06629e-05	0.000586173
	GO:0009800	cinnamic acid biosynthetic process	7	3.61897e-05	0.00066951
	GO:0046244	salicylic acid catabolic process	7	3.61897e-05	0.00066951
	GO:0046274	lignin catabolic process	12	5.7205e-05	0.00104149
	GO:0009744	response to sucrose	40	6.79313e-05	0.00121746
	GO:0006598	polyamine catabolic process	17	7.1192e-05	0.00125627
	GO:0044237	cellular metabolic process	21	7.89386e-05	0.00137186
	GO:0007165	signal transduction	149	8.64043e-05	0.00147919
	GO:0009873	ethylene-activated signaling pathway	39	9.69262e-05	0.00163492
	GO:0043090	amino acid import	23	0.00010582	0.00175907
	GO:0009733	response to auxin	57	0.000122317	0.00198614
	GO:0007154	cell communication	42	0.000122943	0.00198614
	GO:0061025	membrane fusion	50	0.000158478	0.00252464
	GO:0045087	innate immune response	29	0.000174073	0.00273509
	GO:0015824	proline transport	21	0.000220531	0.00341823
	GO:0001666	response to hypoxia	20	0.000225864	0.00345422
	GO:0031408	oxylipin biosynthetic process	16	0.000237301	0.00358138
	GO:0009115	xanthine catabolic process	6	0.000246079	0.00366561
	GO:0006636	unsaturated fatty acid biosynthetic process	20	0.000249638	0.00367095
	GO:0009627	systemic acquired resistance	61	0.000256015	0.00371708
	GO:0009693	ethylene biosynthetic process	20	0.000404317	0.0057969
	GO:0009819	drought recovery	7	0.000439939	0.00622975
	GO:0009851	auxin biosynthetic process	12	0.000458219	0.00640948
	GO:0071805	potassium ion transmembrane transport	15	0.00052458	0.00724931
	GO:0006979	response to oxidative stress	47	0.00055985	0.00764462
	GO:0009416	response to light stimulus	31	0.000729315	0.00984146
II	GO:0006606	protein import into nucleus	48	6.16564e-27	6.82537e-24
	GO:0001510	RNA methylation	59	1.82804e-26	1.01182e-23
	GO:0009220	pyrimidine ribonucleotide biosynthetic process	49	6.51403e-25	2.40368e-22
	GO:0006626	protein targeting to mitochondrion	37	5.33001e-18	1.47508e-15
	GO:0009560	embryo sac egg cell differentiation	36	3.4634e-13	7.66798e-11
	GO:0009909	regulation of flower development	52	3.43342e-12	6.33466e-10
	GO:0006406	mRNA export from nucleus	23	9.56761e-12	1.51305e-09
	GO:0010388	cullin deneddylation	27	2.31379e-10	3.20171e-08
	GO:0006364	rRNA processing	41	8.99369e-10	1.10622e-07
	GO:0009640	photomorphogenesis	39	1.03603e-09	1.14688e-07
	GO:0006164	purine nucleotide biosynthetic process	16	1.27813e-08	1.28626e-06
	GO:0034968	histone lysine methylation	26	1.98608e-08	1.83216e-06
	GO:0006412	translation	67	5.25362e-08	4.47366e-06
	GO:0009765	photosynthesis, light harvesting	10	5.78554e-08	4.57471e-06
	GO:0006259	DNA metabolic process	47	6.36152e-08	4.69481e-06
	GO:0000741	karyogamy	18	1.4642e-07	1.01304e-05
	GO:0042254	ribosome biogenesis	25	2.23846e-07	1.45763e-05
	GO:0018298	protein-chromophore linkage	12	4.94989e-07	3.04418e-05
	GO:0006139	nucleobase-containing compound metabolic process	208	5.72672e-07	3.33657e-05
	GO:0006261	DNA-dependent DNA replication	21	6.92996e-07	3.83573e-05
	GO:0008283	cell proliferation	26	1.29046e-06	6.80255e-05
	GO:0007049	cell cycle	42	2.20606e-06	0.000111005
	GO:0016570	histone modification	16	2.37358e-06	0.000114242
	GO:0051567	histone H3-K9 methylation	27	3.18701e-06	0.000147001
	GO:0000462	maturation of SSU-rRNA from tricistronic rRNA transcript (SSU-rRNA, 5.8S rRNA, LSU-rRNA)	9	3.51811e-06	0.000155782
	GO:0042991	transcription factor import into nucleus	10	4.91962e-06	0.000209462
	GO:0019252	starch biosynthetic process	25	9.4077e-06	0.000385716
	GO:0048449	floral organ formation	16	1.60635e-05	0.000635084
	GO:0009553	embryo sac development	14	2.04969e-05	0.000782416
	GO:0006974	cellular response to DNA damage stimulus	22	2.21847e-05	0.000818614
	GO:0006275	regulation of DNA replication	19	2.4709e-05	0.000882352
	GO:0090305	nucleic acid phosphodiester bond hydrolysis	23	2.77099e-05	0.000958588
	GO:0010114	response to red light	15	9.14339e-05	0.00306719
	GO:0035196	production of miRNAs involved in gene silencing by miRNA	20	0.000102192	0.00332725
	GO:0009637	response to blue light	16	0.000130402	0.00412444
	GO:0000059	protein import into nucleus, docking	6	0.000154577	0.00475326
	GO:0000226	microtubule cytoskeleton organization	21	0.000202208	0.00604985
	GO:0000398	mRNA splicing, via spliceosome	18	0.000281525	0.00820126
	GO:0001522	pseudouridine synthesis	8	0.000321739	0.00905911
	GO:0000478	endonucleolytic cleavage involved in rRNA processing	6	0.000331606	0.00905911
	GO:0006281	DNA repair	29	0.000343604	0.00905911
	GO:0016572	histone phosphorylation	12	0.000343706	0.00905911
	GO:0006396	RNA processing	22	0.000357251	0.00919713
	GO:0005978	glycogen biosynthetic process	5	0.000379334	0.00953176
	GO:0006312	mitotic recombination	10	0.00038747	0.00953176
	GO:0009768	photosynthesis, light harvesting in photosystem I	4	0.000404056	0.00972369
	GO:0006306	DNA methylation	22	0.000420869	0.00991281
III	GO:0008152	metabolic process	331	4.83182e-17	3.80748e-14
	GO:0055114	oxidation-reduction process	114	1.05472e-13	3.17778e-11
	GO:0006032	chitin catabolic process	16	1.20982e-13	3.17778e-11
	GO:0006950	response to stress	152	2.86266e-12	5.63944e-10
	GO:0009611	response to wounding	47	1.14475e-10	1.80413e-08
	GO:0010310	regulation of hydrogen peroxide metabolic process	30	7.06164e-10	9.27429e-08
	GO:0010951	negative regulation of endopeptidase activity	14	9.96014e-10	1.12123e-07
	GO:0007109	cytokinesis, completion of separation	10	1.42298e-09	1.40164e-07
	GO:0001666	response to hypoxia	17	5.82043e-09	5.09611e-07
	GO:0009862	systemic acquired resistance, salicylic acid mediated signaling pathway	33	6.50102e-09	5.12281e-07
	GO:0005975	carbohydrate metabolic process	66	9.2397e-09	6.61898e-07
	GO:0000272	polysaccharide catabolic process	17	1.27883e-08	8.39764e-07
	GO:0009642	response to light intensity	10	2.72905e-08	1.65422e-06
	GO:0006979	response to oxidative stress	32	3.60486e-08	2.02902e-06
	GO:0031640	killing of cells of other organism	8	4.03381e-08	2.1191e-06
	GO:0018171	peptidyl-cysteine oxidation	5	6.27369e-08	3.08979e-06
	GO:0010167	response to nitrate	25	9.91379e-08	4.59533e-06
	GO:0015706	nitrate transport	26	1.11095e-07	4.86349e-06
	GO:0009809	lignin biosynthetic process	17	1.27707e-07	5.29649e-06
	GO:0010466	negative regulation of peptidase activity	9	1.13321e-06	4.46483e-05
	GO:0070483	detection of hypoxia	5	1.23583e-06	4.63732e-05
	GO:0016998	cell wall macromolecule catabolic process	9	2.49989e-06	8.95416e-05
	GO:0009607	response to biotic stimulus	52	2.79146e-06	9.56379e-05
	GO:0009651	response to salt stress	50	4.68408e-06	0.000153794
	GO:0006569	tryptophan catabolic process	11	5.86595e-06	0.000184895
	GO:0009409	response to cold	35	1.02643e-05	0.000311088
	GO:0052696	flavonoid glucuronidation	18	1.07639e-05	0.0003119
	GO:0002238	response to molecule of fungal origin	8	1.13936e-05	0.0003119
	GO:0009723	response to ethylene	25	1.20051e-05	0.0003119
	GO:0042744	hydrogen peroxide catabolic process	19	1.22702e-05	0.0003119
	GO:0009617	response to bacterium	19	1.22702e-05	0.0003119
	GO:0009871	jasmonic acid and ethylene-dependent systemic resistance, ethylene mediated signaling pathway	5	2.59258e-05	0.000638423
	GO:0009684	indoleacetic acid biosynthetic process	11	3.09436e-05	0.000733783
	GO:0080027	response to herbivore	6	3.16607e-05	0.000733783
	GO:0009627	systemic acquired resistance	31	5.45723e-05	0.00122866
	GO:0009628	response to abiotic stimulus	81	6.05391e-05	0.00132513
	GO:1901430	positive regulation of syringal lignin biosynthetic process	6	0.000115545	0.00246079
	GO:0034059	response to anoxia	4	0.000120343	0.00249554
	GO:0050832	defense response to fungus	31	0.000128186	0.00259002
	GO:0080167	response to karrikin	15	0.00015639	0.00305349
	GO:0010089	xylem development	13	0.000158874	0.00305349
	GO:0042631	cellular response to water deprivation	15	0.000269597	0.00505815
	GO:0016926	protein desumoylation	13	0.000334027	0.00607051
	GO:0019748	secondary metabolic process	27	0.000338963	0.00607051
	GO:0050665	hydrogen peroxide biosynthetic process	13	0.000354129	0.00616841
	GO:0010363	regulation of plant-type hypersensitive response	31	0.000360085	0.00616841
	GO:0009682	induced systemic resistance	4	0.000458841	0.00769291
	GO:0009805	coumarin biosynthetic process	11	0.000483513	0.00793767
IV	GO:0043085	positive regulation of catalytic activity	10	2.01378e-08	8.88078e-06
	GO:0000023	maltose metabolic process	8	1.82789e-05	0.00403051
V	GO:0010200	response to chitin	18	1.48623e-08	5.09777e-06
	GO:0009719	response to endogenous stimulus	24	1.13715e-06	0.000195021
	GO:0009753	response to jasmonic acid	11	1.23014e-05	0.00140646
	GO:0009873	ethylene-activated signaling pathway	9	4.13283e-05	0.00354391
	GO:0048480	stigma development	2	9.15265e-05	0.00627872
